# Supplementary material for: Mechanisms of strength, thermal stability, and doping effects in metal-doped bilayer borophene for energy storage applications using a DFT-trained deep-learning potential
Source: Royal Society of Chemistry journal article supplement (doi:10.1039/d5ta08592f), 2026-01-01
Supplement: d5ta08592f1.pdf [file d5ta08592f1.pdf]

**Mechanisms of Strength, Thermal Stability, and Doping Effects in Metal-Doped  
Bilayer Borophene for Energy Storage Applications Using a DFT-Trained Deep-  
Learning Potential**

Shin-Pon Ju<sup>1,2\*</sup>, An-Zhi Lin<sup>1</sup>, Shan-Han Lo<sup>1</sup>, Hui-Lung Chen<sup>3\*</sup>, Hsin-Tsung Chen<sup>4\*</sup>,  
and Hsing-Yin Chen<sup>2</sup>

<sup>1</sup>Department of Mechanical and Electro-Mechanical Engineering, National Sun Yat-sen University, Kaohsiung 804, Taiwan

<sup>2</sup>Department of Medicinal and Applied Chemistry, Kaohsiung Medical University, Kaohsiung 80708, Taiwan

<sup>3</sup>Department of Chemical and Materials Engineering, Chinese Culture University, Taipei, 111, Taiwan

<sup>4</sup>Department of Chemistry R&D Center for Membrane Technology and Research Center for Semiconductor Materials and Advanced Optics, Chung Yuan Christian University, Chungli District, Taoyuan City 320314, Taiwan

\*Corresponding author: (Shin-Pon Ju: [jushin-pon@mail.nsysu.edu.tw](mailto:jushin-pon@mail.nsysu.edu.tw), Hui-Lung Chen ([chl3@ulive.pccu.edu.tw](mailto:chl3@ulive.pccu.edu.tw)), Hsin-Tsung Chen ([htchen@cycu.edu.tw](mailto:htchen@cycu.edu.tw)))

Table S1. DFT simulation parameters used in Quantum ESPRESSO for bilayer borophene.

| Parameter type                                              | Setting or value           |
|-------------------------------------------------------------|----------------------------|
| Calculation type                                            | NPT or SCF                 |
| Pressure (Kbar)                                             | 0                          |
| Temperature (K)                                             | 50~1000 K                  |
| Number of ionic steps                                       | 200                        |
| time step size (fs)                                         | 1                          |
| Kinetic energy cutoff (Ry) for wavefunctions                | 40                         |
| Kinetic energy cutoff (Ry) for charge density and potential | 320                        |
| Convergence criterion of self-consistent calculation, (Ry)  | $2 \times 10^{-5}$         |
| Pseudopotential (version)                                   | SSSP efficiency<br>(V1.30) |
| K-point setting level using Materials Cloud                 | Normal                     |

Table S2. Parameter settings for DeePMD DLP training

| Parameter                                      | Value                                  |
|------------------------------------------------|----------------------------------------|
| model descriptor                               | se_a                                   |
| rcut, Å                                        | 6                                      |
| rsmth, Å                                       | 5.8                                    |
| embedding neural network                       | {25, 50, 100}                          |
| fitting neural network                         | {240, 240, 240}                        |
| DPGEN models                                   | 4                                      |
| training step for label process/final training | 1*10 <sup>6</sup> /2.5*10 <sup>6</sup> |
| $p_e^{start}$ (starting energy weight)         | 1                                      |
| $p_e^{limit}$ (final energy weight)            | 1                                      |
| $p_f^{start}$ (starting force weight)          | 1000                                   |
| $p_f^{limit}$ (final force weight)             | 1                                      |

Table S3. Atomic structures employed in the DFT calculations at 50 K and 300 K. Since reference b does not provide explicit structure names, the borophene configurations shown in the corresponding figure are adopted.

| Structure                         | Structural Type        | Atoms |
|-----------------------------------|------------------------|-------|
| $\beta$ 12 borophene <sup>a</sup> |                        | 15    |
| x3 bigophone                      | Single-layer borophene | 20    |
| striped borophene <sup>a</sup>    |                        | 16    |
| Borophene(Fig.1a) <sup>b</sup>    |                        | 32    |
| Borophene(Fig.1c) <sup>b</sup>    |                        | 16    |
| Borophene(Fig.1e) <sup>b</sup>    |                        | 16    |
| Borophene(Fig.1f) <sup>b</sup>    |                        | 8     |
| Borophene(Fig.5i) <sup>b</sup>    |                        | 30    |
| Borophene(Fig.5j) <sup>b</sup>    |                        | 60    |
| Borophene(Fig.5k) <sup>b</sup>    | Bilayer Borophene      | 60    |
| Borophene(Fig.5m) <sup>b</sup>    |                        | 62    |
| Borophene(Fig.5n) <sup>b</sup>    |                        | 14    |
| Borophene(Fig.5o) <sup>b</sup>    |                        | 28    |
| Borophene(Fig.5p) <sup>b</sup>    |                        | 28    |
| Borophene(Fig.5s) <sup>b</sup>    |                        | 56    |
| Borophene(Fig.5t) <sup>b</sup>    |                        | 16    |

a: Peng, Bo, et al. Stability and strength of atomically thin borophene from first principles calculations. *Materials Research Letters*, 2017, 5.6: 399-407.

b: Gao, Nan, et al. Structure and stability of bilayer borophene: The roles of hexagonal holes and interlayer bonding. *FlatChem*, 2018, 7: 48-54.



Table S4. Structures used in the DFT calculations. The simulations were performed at 300 K.

| Structure                    | Structural Type   | Atoms |
|------------------------------|-------------------|-------|
| p6m2 borophene <sup>a</sup>  |                   | 64    |
| p6m2 borophene <sup>a</sup>  |                   | 64    |
| p6m2 borophene <sup>a</sup>  |                   | 16    |
| p6m2 borophene <sup>a</sup>  | Bilayer Borophene | 16    |
| p6mmm borophene <sup>a</sup> |                   | 18    |
| p6m2 borophene <sup>a</sup>  |                   | 16    |
| p6mmm borophene <sup>a</sup> |                   | 18    |

<sup>a</sup>Gao, Nan, et al. Density functional theory study of bilayer borophene-based anode material for rechargeable lithium ion batteries. *Langmuir*, 2023, 39.29: 10270-10279.

Table S5. Structures used in the DFT calculations. The simulations were performed at five different temperatures: 300 K, 400 K, 500 K, 600 K and 1000 K.

| Structure                   | Structural Type     | Atoms |
|-----------------------------|---------------------|-------|
| p6m2 borophene (Al doping)  | Metal-doped bilayer | 64    |
| p6m2 borophene (Ru doping)  |                     | 64    |
| p6mmm borophene (Al doping) |                     | 72    |
| p6mmm borophene (Ru doping) |                     | 72    |



Table S6. Structures used in the DFT calculations. The simulations were performed at six different temperatures: 50 K, 300 K, 400 K, 500 K, 600 K and 1000 K.

| Formula                      | Structure         | Atoms |
|------------------------------|-------------------|-------|
| p6m2 borophene <sup>c</sup>  | Bilayer Borophene | 16    |
| p6mmm borophene <sup>c</sup> |                   | 18    |

Table S7. Configuration-averaged nearest-neighbor bond lengths for B–B, B–Al, and B–Ru pairs in pristine and doped p6m2 and p6mmm bilayers. Values are obtained from relaxed structures by averaging over all first-neighbor pairs.  $\Delta L(\text{B-X})$  denotes the bond-length mismatch, defined as the difference between the dopant–boron bond length (B–Al or B–Ru) and the average B–B bond length in the same configuration.

| Configuration           | Average bond length (Å) |        |        | $\Delta L(\text{B-X})^a$<br>(Å) |
|-------------------------|-------------------------|--------|--------|---------------------------------|
|                         | B-B                     | B-Al   | B-Ru   |                                 |
| <b>p6m2 (pristine)</b>  | 1.7384                  | —      | —      | —                               |
| p6m2-Al(0.8 at.%)       | 1.7340                  | 2.1566 | —      | +0.4226                         |
| p6m2-Al(1.6 at.%)       | 1.7324                  | 2.1560 | —      | +0.4236                         |
| p6m2-Ru(0.8 at.%)       | 1.7333                  | —      | 2.1642 | +0.4309                         |
| p6m2-Ru(1.6 at.%)       | 1.7329                  | —      | 2.1622 | +0.4293                         |
| <b>p6mmm (pristine)</b> | 1.8399                  | —      | —      | —                               |
| p6mmm-Al(1.05 at.%)     | 1.8002                  | 2.1553 | —      | +0.3551                         |
| p6mmm-Al(2.1 at.%)      | 1.7929                  | 2.1562 | —      | +0.3633                         |
| p6mmm-Ru(1.05 at.%)     | 1.8017                  | —      | 2.1649 | +0.3632                         |
| p6mmm-Ru(2.1 at.%)      | 1.7957                  | —      | 2.1629 | +0.3672                         |

Table S8. Interlayer bond dissociation energies for pristine and doped p6m2 and p6mmm bilayers, evaluated from the energy difference between the intact bilayer and two isolated single layers separated by a distance much larger than the DLP cutoff. For each configuration, the total energy difference  $\Delta E$  between the bound bilayer and the non-interacting monolayers is divided by the number of CN7-mediated interlayer bonds  $N_{\text{bond}}$  to obtain the per-bond dissociation energy  $E_{\text{diss}}^{(\text{per CN7})}$ . The table lists the total number of interlayer bonds, the numbers of B–X and B–B interlayer bonds, and the corresponding  $E_{\text{diss}}^{(\text{per CN7})}$  values.

| Configuration       | interlayer<br>bonds | B-X(Al/Ru)<br>bonds | B-B<br>bonds | $E_{\text{diss}}^{(\text{per CN7})}$<br>(eV/bonds) |
|---------------------|---------------------|---------------------|--------------|----------------------------------------------------|
| pristine_p6m2       | 1260                | 0                   | 1260         | 0.94                                               |
| p6m2-Al(0.8 at.%)   | 1260                | 90                  | 1170         | 0.89                                               |
| p6m2-Al(1.6 at.%)   | 1260                | 180                 | 1080         | 0.89                                               |
| p6m2-Ru(0.8 at.%)   | 1260                | 90                  | 1170         | 0.84                                               |
| p6m2-Ru(1.6 at.%)   | 1260                | 180                 | 1080         | 0.80                                               |
| pristine_p6mmm      | 4322                | 0                   | 4322         | 1.29                                               |
| p6mmm-Al(1.05 at.%) | 4322                | 144                 | 4178         | 1.28                                               |
| p6mmm-Al(2.1 at.%)  | 4322                | 288                 | 4034         | 1.23                                               |

|                     |      |     |      |      |
|---------------------|------|-----|------|------|
| p6mmm-Ru(1.05 at.%) | 4322 | 144 | 4178 | 1.03 |
| p6mmm-Ru(2.1 at.%)  | 4322 | 288 | 4034 | 0.73 |

---

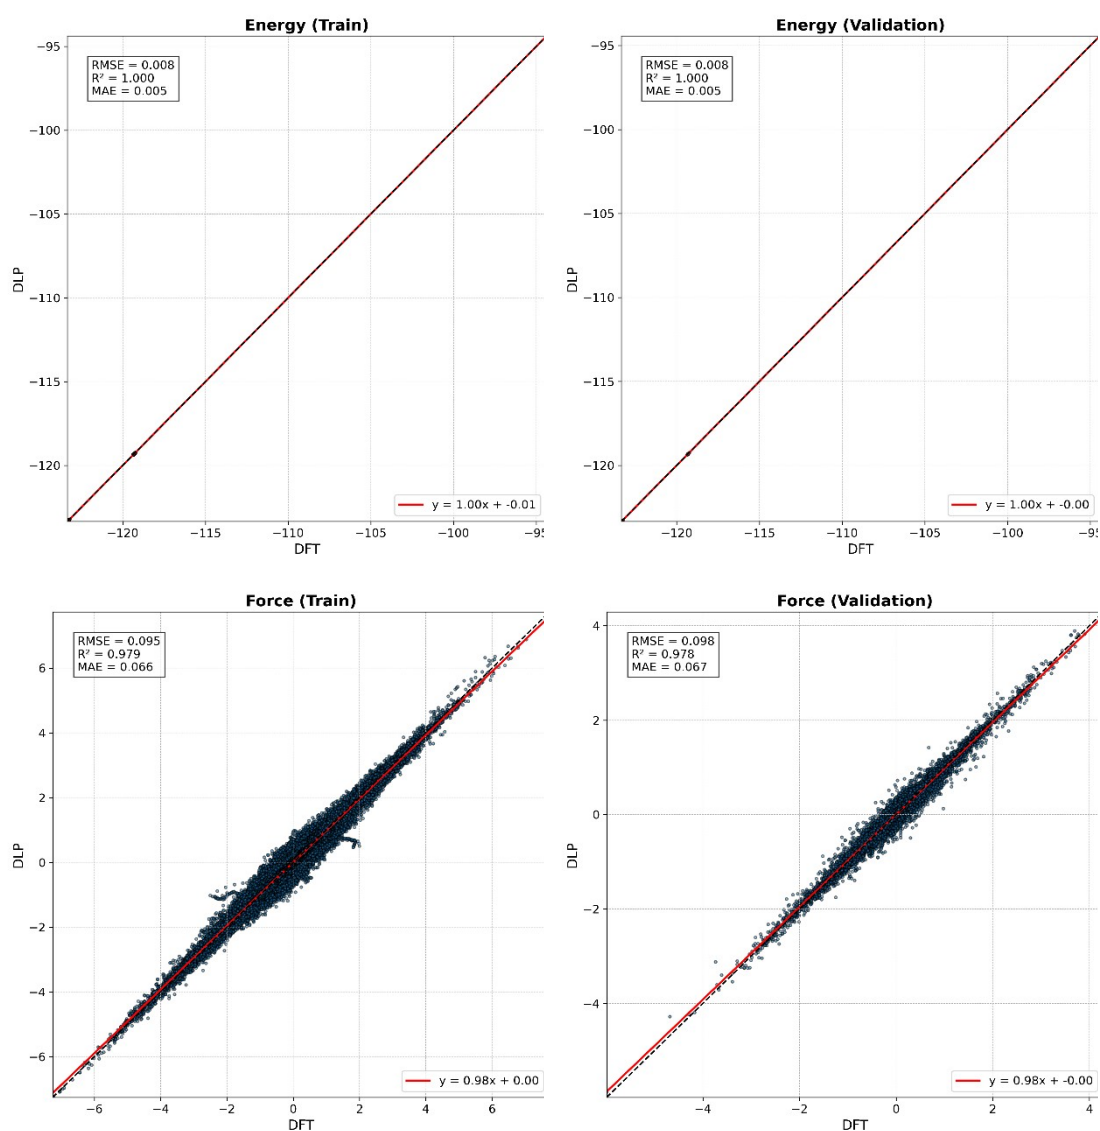

Figure S1. Correlation between DLP and DFT predictions for system energies and atomic forces. Results are shown for the training set (95%) and validation set (5%). Black lines represent the ideal  $y = x$  correlation, while red lines indicate linear regression fits. Energy is in eV/atom and force in eV/Å.

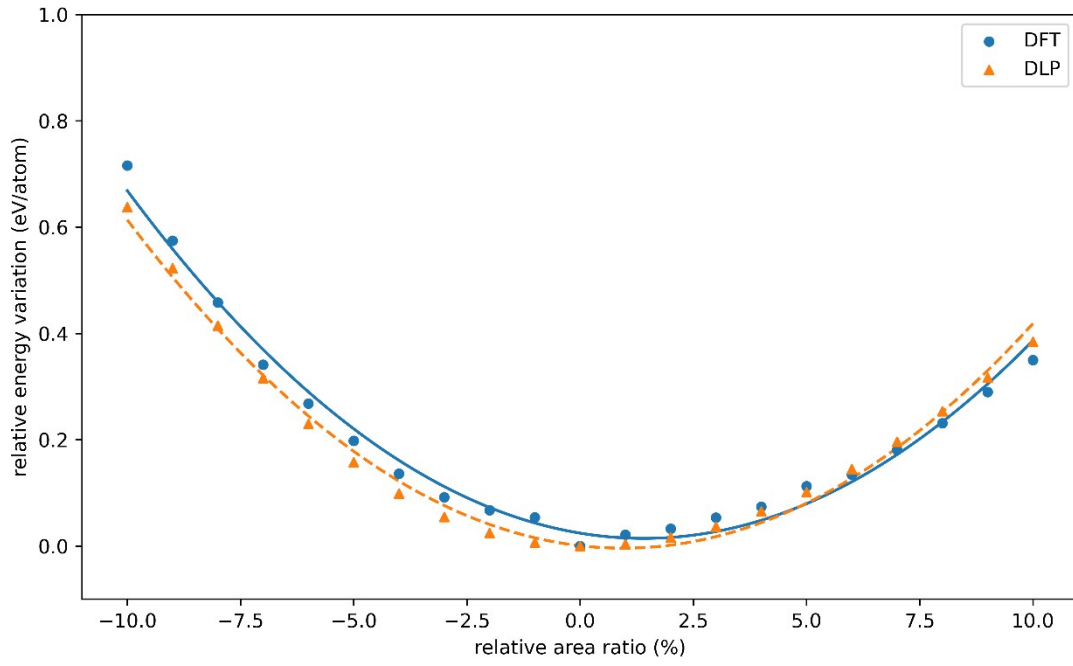

(a)

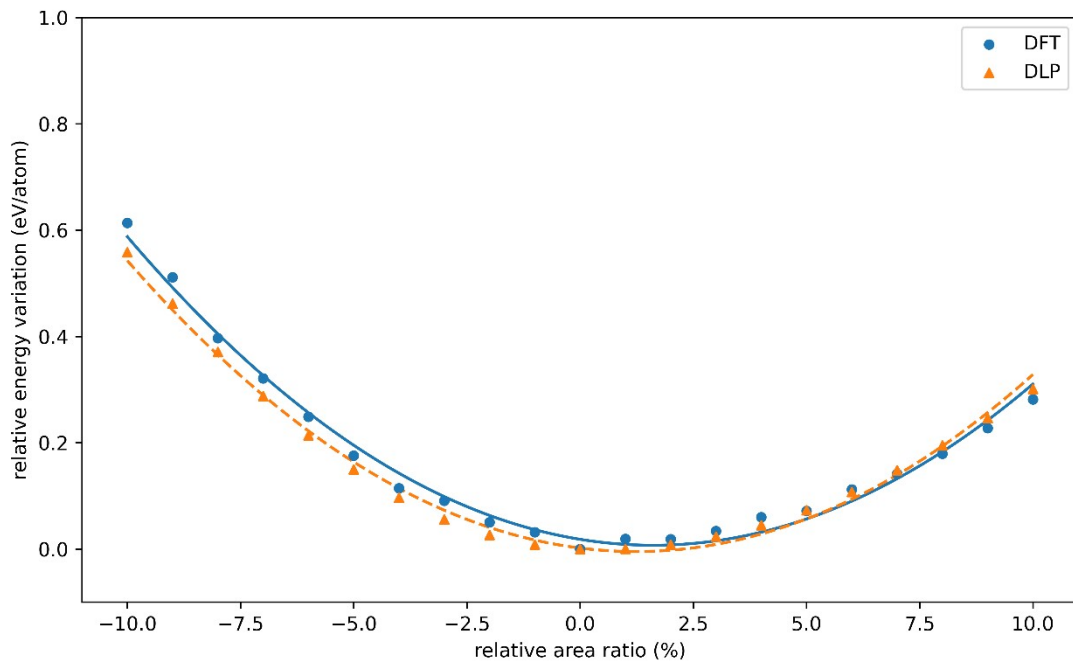

(b)

Figure S2. Energy-area curves for bilayer borophene structures calculated using DLP and DFT: (a)p6m2-Al(0.8 at.%) and (b)p6m2-Ru(0.8 at.%). The relaxed configurations at 0% strain serve as reference states. Structures were uniformly scaled in both x and y directions.
